# Supplementary material for: One-pot synthesis of Ag–In–Ga–S nanocrystals embedded in a Ga2O3 matrix and enhancement of band-edge emission by Na+ doping
Source: Royal Society of Chemistry journal article supplement (doi:10.1039/d3na00755c), 2023-01-01
Supplement: d3na00755c1.pdf [file d3na00755c1.pdf]

## Supplementary Information

### **One-pot synthesis of Ag–In–Ga–S nanocrystals embedded in a Ga<sub>2</sub>O<sub>3</sub> matrix and enhancement of band-edge emission by Na<sup>+</sup> doping**

Makoto Tozawa,<sup>a</sup> Chie Miyamae,<sup>a</sup> Kazutaka Akiyoshi,<sup>a</sup> Tatsuya Kameyama,<sup>a</sup> Takahisa Yamamoto,<sup>a</sup> Genichi Motomura,<sup>b, c</sup> Yoshihide Fujisaki,<sup>b</sup> Taro Uematsu,<sup>c, d</sup> Susumu Kuwabata<sup>c, d</sup> and Tsukasa Torimoto<sup>\*a</sup>

<sup>a</sup> Graduate School of Engineering, Nagoya University, Chikusa-ku, Nagoya 464-8603, Japan

<sup>b</sup> Science & Technology Research Laboratories, Japan Broadcasting Corporation (NHK), 1-10-11 Kinuta, Setagaya-ku, Tokyo 157-8510, Japan

<sup>c</sup> Department of Applied Chemistry, Graduate School of Engineering, Osaka University, Suita, Osaka 565-0871, Japan

<sup>d</sup> Innovative Catalysis Science Division, Institute for Open and Transdisciplinary Research Initiatives (ICS-OTRI), Osaka University, Suita, Osaka 565-0871, Japan

\* The author to whom correspondence should be addressed:

torimoto@chembio.nagoya-u.ac.jp

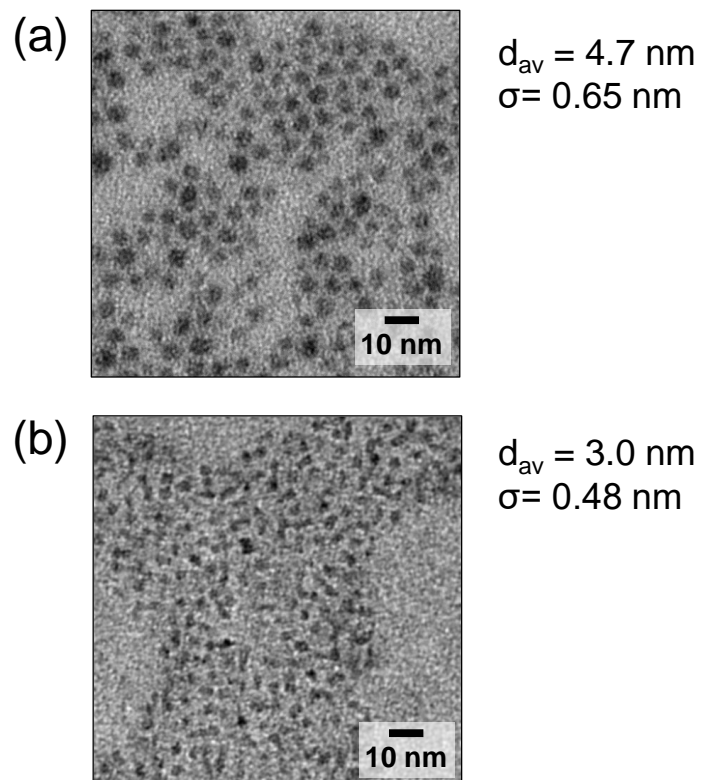

**Figure S1.** Wide-area TEM images of AIGS QDs prepared in the absence of  $\text{Na}^+$  ions. The samples were prepared with elemental sulfur (a) and thiourea (b) under the ratios of  $\text{Na}/(\text{Ag}+\text{Na})=0.30$  and  $\text{In}/(\text{In}+\text{Ga})=0.20$  in the precursors. The average size ( $d_{av}$ ) and standard deviation ( $\sigma$ ) of particles are shown beside the corresponding images.

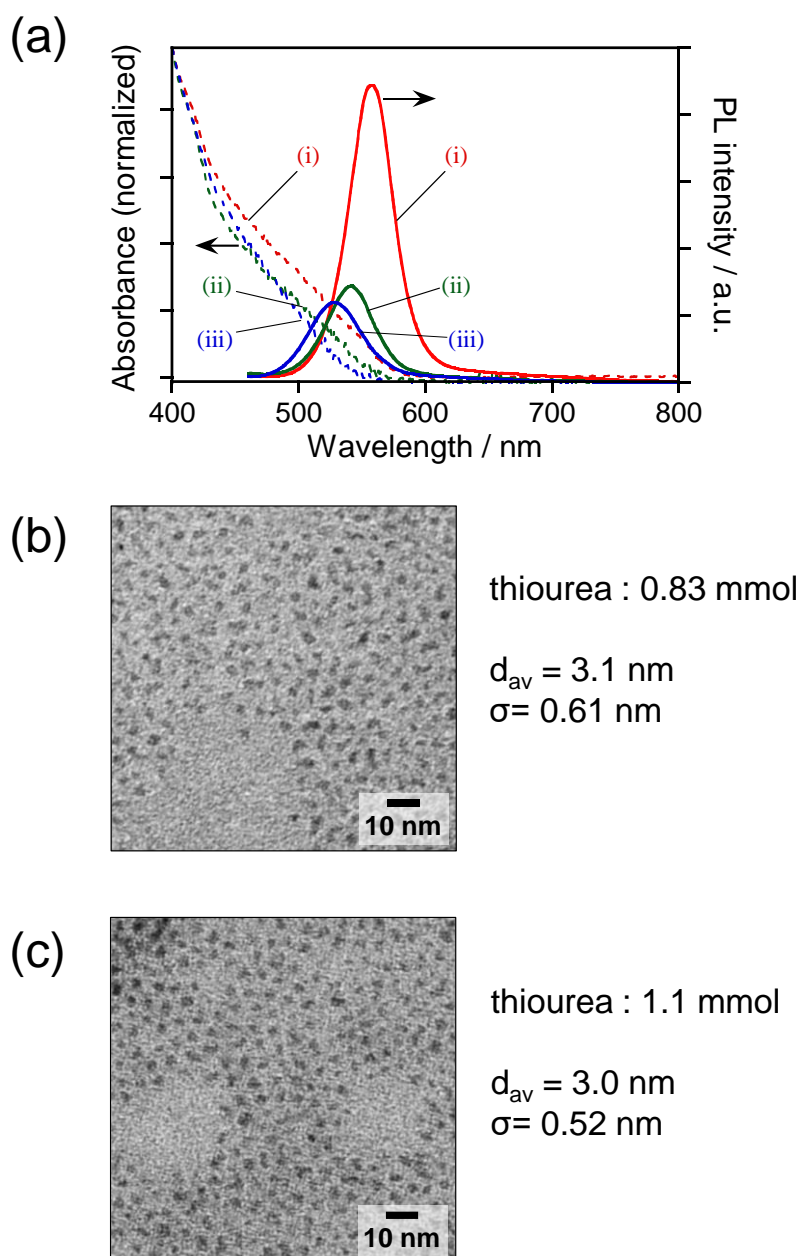

**Figure S2.** (a) Absorption and PL spectra of Na-AIGS(1.5)(tu) QDs prepared with various amount of thiourea. The QDs were prepared with the addition of (i) 0.55, (ii) 0.83, and (iii) 1.1 mmol thiourea under the fixed ratios of  $\text{Na}/(\text{Ag}+\text{Na}) = 0.30$  and  $\text{In}/(\text{In}+\text{Ga}) = 0.20$  in the precursors. The wavelength of excitation light for PL measurements was 365 nm. (b, c) TEM images of Na-AIGS(1.5)(tu) QDs obtained with (b) 0.83 and (c) 1.1 mmol thiourea in the precursors. The average size ( $d_{av}$ ) and standard deviation ( $\sigma$ ) of particles are shown beside the corresponding images.

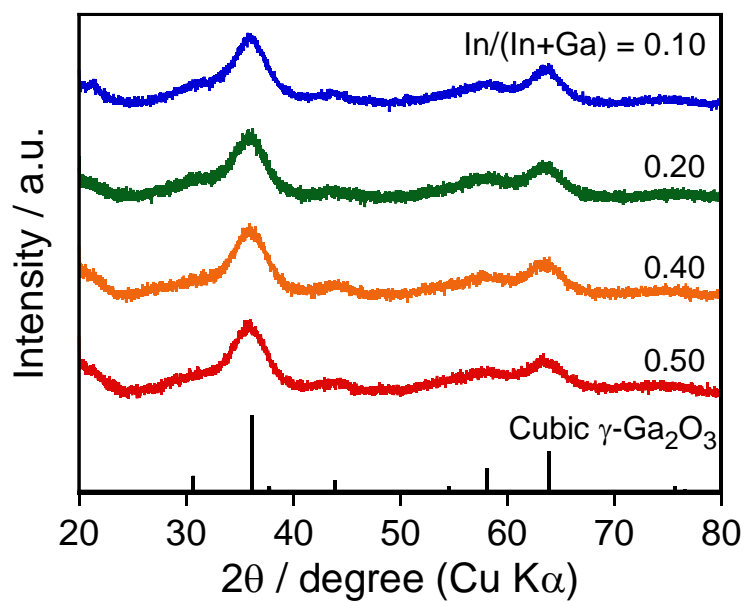

**Figure S3.** XRD patterns of Na-AIGS(1.0)(tu) QDs with different ratios of In/(In+Ga) in the precursors. The samples were prepared under the same conditions as those in Fig. 4.

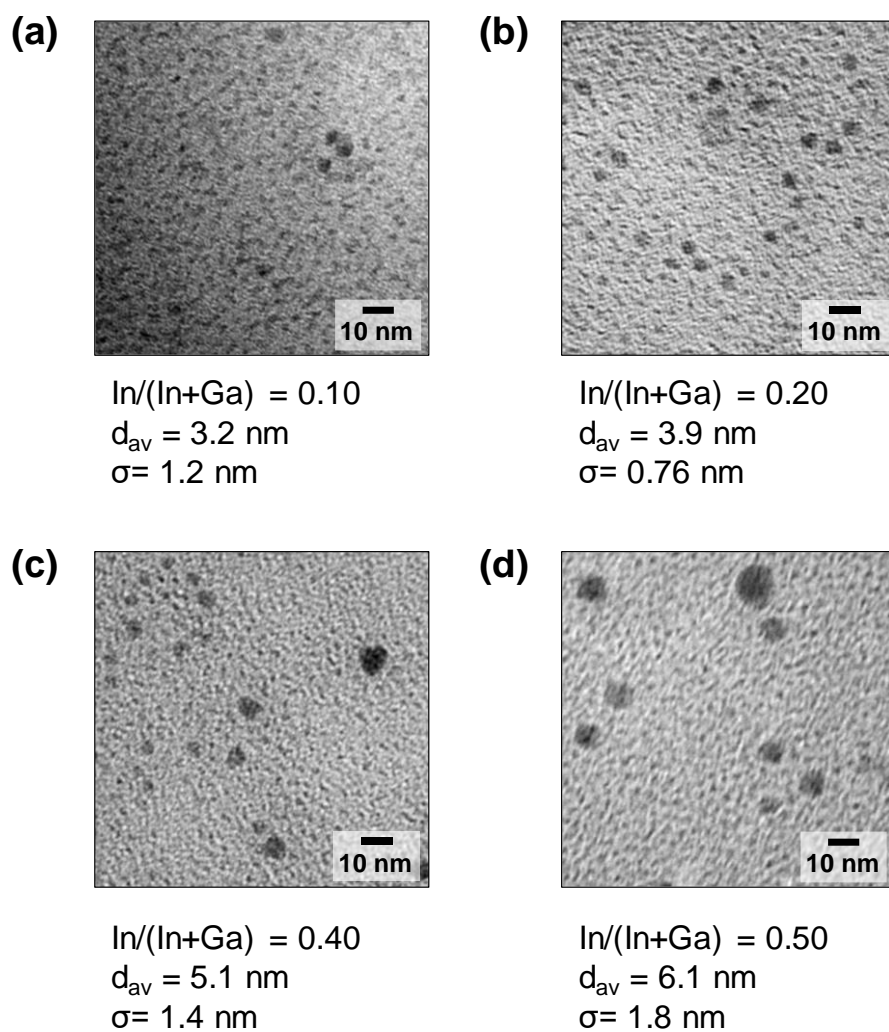

**Figure S4.** TEM images of Na-AIGS(1.0)(tu) QDs with different ratios of In/(In+Ga) in the precursors. The average size ( $d_{\text{av}}$ ) and standard deviation ( $\sigma$ ) of particles are shown below the corresponding images. The samples were prepared under the same conditions as those in Fig. 4.

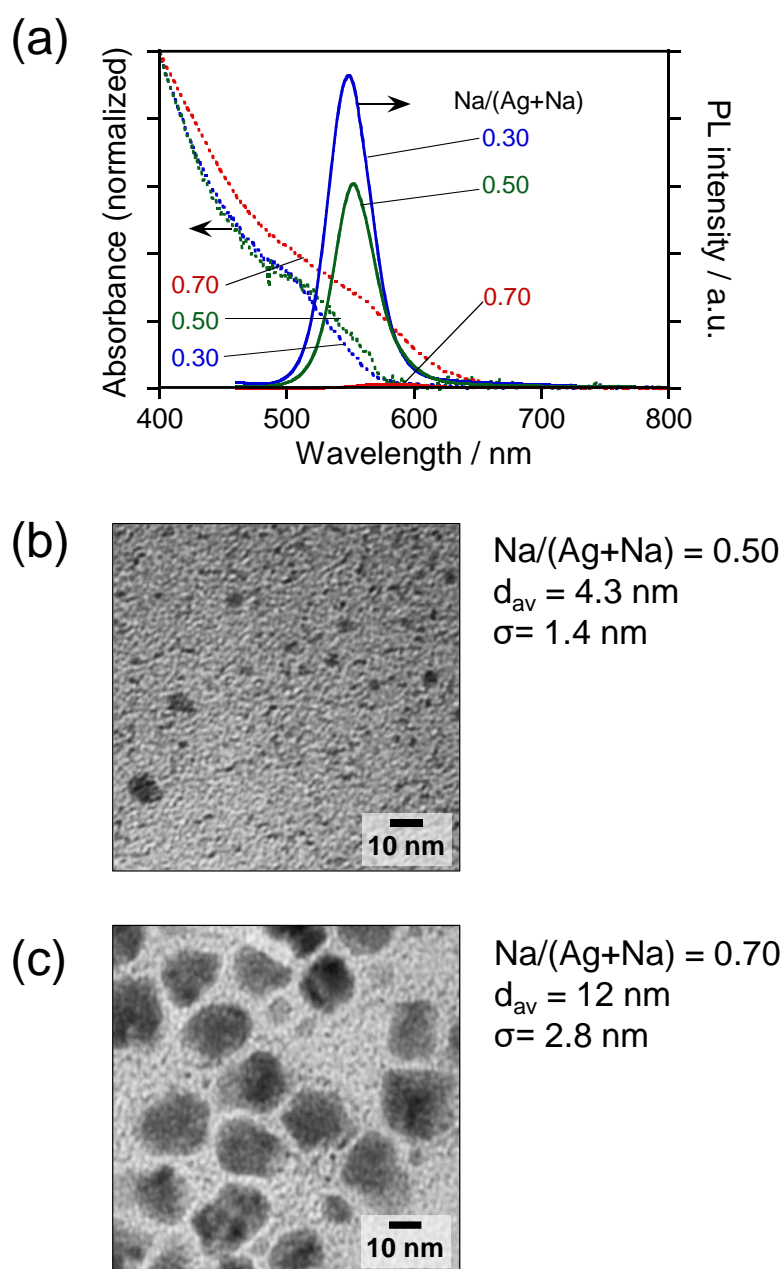

**Figure S5.** (a) Absorption and PL spectra of Na-AIGS(1.0)(tu) QDs prepared with different Na/(Ag+Na) ratios in the precursors. The wavelength of excitation light for PL measurements was 365 nm. (b, c) TEM images of Na-AIGS(1.0)(tu) QDs with Na/(Ag+Na) of (b) 0.50 and (c) 0.70. The In/(In+Ga) ratio in the precursors was fixed to 0.20.

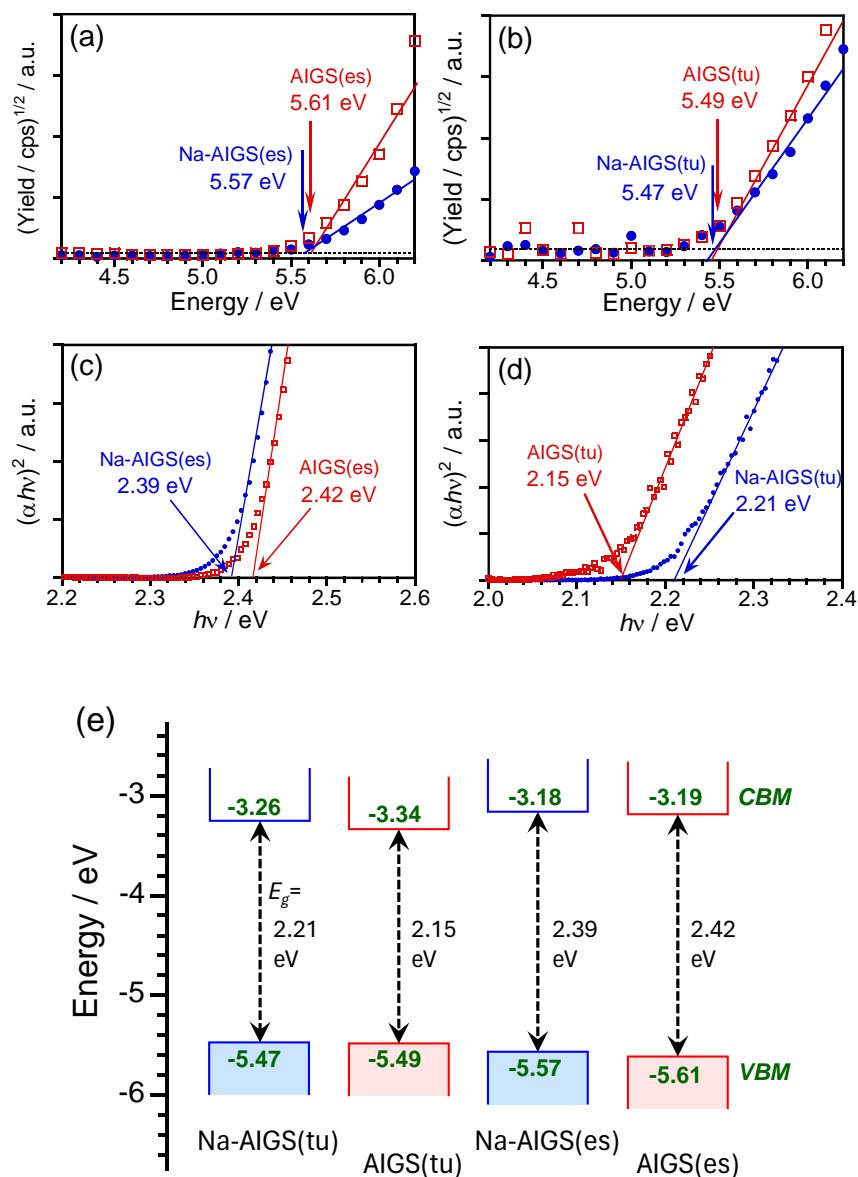

**Figure S6.** (a, b) Photoelectron yield spectra and (c, d) Tauc plots of AIGS(1.5) QDs prepared with and without Na<sup>+</sup> addition. The S precursors used for the preparation were thiourea (a, c) and elemental sulfur (b, d). (e) Electronic energy structures of AIGS and Na-AIGS QDs. The samples were prepared under the same conditions as those in Fig. 1.

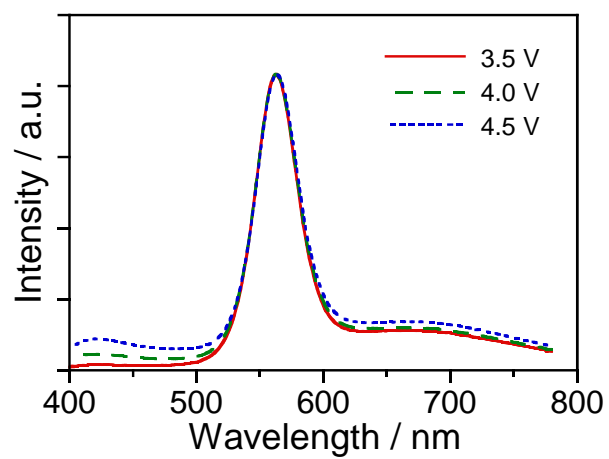

**Figure S7.** EL spectra of the QD-LED device containing Na-AIGS(1.5)(tu) QDs at different applied voltages.



**Table S1.** Chemical compositions of Na-AIGS(1.5)(tu) QDs<sup>(a)</sup> prepared with different amount of thiourea in the precursors.

| Amount of thiourea / mmol | Fraction (%) |     |     |    |    | Charge balance (anion/cation) | Metal ratios |          |
|---------------------------|--------------|-----|-----|----|----|-------------------------------|--------------|----------|
|                           | Na           | Ag  | In  | Ga | S  |                               | In/(In+Ga)   | Na/metal |
| 0.55                      | 2.5          | 1.2 | 0.7 | 70 | 26 | 0.24                          | 0.01         | 0.034    |
| 0.83                      | 5.0          | 0.2 | 0.4 | 62 | 33 | 0.34                          | 0.006        | 0.074    |
| 1.1                       | 5.0          | 0.5 | 0.3 | 60 | 34 | 0.36                          | 0.005        | 0.075    |

(a) The samples were prepared under the same conditions as those in Fig. S2.

**Table S2.** PL peak wavelengths and quantum yields of Na-AIGS(1.5)(tu) QDs<sup>(a)</sup> prepared with different amount of thiourea in the precursors.

| Amount of thiourea / mmol | Peak wavelength / nm | PL QY / % |
|---------------------------|----------------------|-----------|
| 0.55                      | 548                  | 58        |
| 0.83                      | 541                  | 20        |
| 1.1                       | 528                  | 18        |

(a) The samples were prepared under the same conditions as those in Fig. S2.

**Table S3.** Chemical compositions of Na-AIGS(1.0)(tu) QDs<sup>(a)</sup> prepared with different In/(In+Ga) ratios in the precursors.

| In/(In+Ga) in the precursors | Fraction (%) |     |     |    |    | Charge balance (anion/cation) | Metal ratio |
|------------------------------|--------------|-----|-----|----|----|-------------------------------|-------------|
|                              | Na           | Ag  | In  | Ga | S  |                               | In/(In+Ga)  |
| 0.10                         | 5.7          | 0.2 | 0.2 | 65 | 29 | 0.29                          | 0.002       |
| 0.20                         | 4.4          | 1.3 | 0.7 | 63 | 30 | 0.30                          | 0.011       |
| 0.40                         | 4.4          | 1.3 | 1.2 | 62 | 31 | 0.32                          | 0.019       |
| 0.50                         | 3.1          | 0.8 | 1.7 | 62 | 32 | 0.33                          | 0.027       |

(a) The samples were prepared under the same conditions as those in Fig. 4.

**Table S4.** PL peak wavelengths and quantum yields of Na-AIGS(1.0)(tu) QDs<sup>(a)</sup> prepared with different In/(In+Ga) ratios in the precursors.

| In/(In+Ga)<br>in the precursors | Peak wavelength<br>/ nm | PL QY / % |
|---------------------------------|-------------------------|-----------|
| 0.10                            | 517                     | 12        |
| 0.20                            | 548                     | 36        |
| 0.40                            | 570                     | 34        |
| 0.50                            | 579                     | 18        |

(a) The samples were prepared under the same conditions as those in Fig. 4.

**Table S5.** Chemical compositions of Na-AIGS(1.0)(tu) QDs<sup>(a)</sup> prepared with different Na/(Ag+Na) ratios in the precursors.

| Na/(Ag+Na)<br>in the precursors | Fraction (%) |     |     |    |    | Charge<br>balance<br>(anion/cation) | Metal ratios |            |
|---------------------------------|--------------|-----|-----|----|----|-------------------------------------|--------------|------------|
|                                 | Na           | Ag  | In  | Ga | S  |                                     | Na/(Ag+Na)   | In/(In+Ga) |
| 0.30                            | 4.4          | 1.3 | 0.7 | 63 | 30 | 0.31                                | 0.77         | 0.011      |
| 0.50                            | 3.7          | 1.0 | 1.0 | 63 | 31 | 0.31                                | 0.79         | 0.016      |
| 0.70                            | 6.0          | 12  | 7.7 | 32 | 42 | 0.61                                | 0.33         | 0.19       |

(a) The samples were prepared under the same conditions as those in Fig. S5.

**Table S6.** PL peak wavelengths and quantum yields of Na-AIGS(1.0)(tu) QDs<sup>(a)</sup> prepared with different Na/(Ag+Na) ratios in precursors.

| Na/(Ag+Na)<br>in the precursors | Peak wavelength / nm | PL QY / % |
|---------------------------------|----------------------|-----------|
| 0.30                            | 548                  | 36        |
| 0.50                            | 550                  | 26        |
| 0.70                            | 575                  | 0.6       |

(a) The samples were prepared under the same conditions as those in Fig. S5.

**Table S7.** Parameters to fit PL decay profiles of AIGS(1.5) QDs.

| Samples     | $\tau_1$ (ns) | $A_1$ (%) | $\tau_2$ (ns) | $A_2$ (%) | $\tau_3$ (ns) | $A_3$ (%) | $\tau_{ave}$ (ns) | $\chi^2$ |
|-------------|---------------|-----------|---------------|-----------|---------------|-----------|-------------------|----------|
| AIGS(es)    | 5.7           | 55        | 37            | 36        | 175           | 8.5       | 99                | 1.20     |
| Na-AIGS(es) | 5.1           | 57        | 33            | 35        | 127           | 7.7       | 68                | 1.12     |
| AIGS(tu)    | 40            | 75        | 175           | 25        | ---           | ---       | 120               | 1.16     |
| Na-AIGS(tu) | 34            | 64        | 109           | 36        | ---           | ---       | 83                | 1.17     |

(a) The samples were prepared under the same conditions as those in Fig. 1.
